# Supplementary material for: Effective targeting of breast cancer stem cells by combined inhibition of Sam68 and Rad51
Source: PubMed Central journal article supplement (PMC8993694; doi:10.1038/s41388-022-02239-4), 2022-02-25

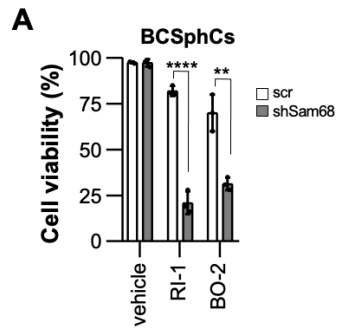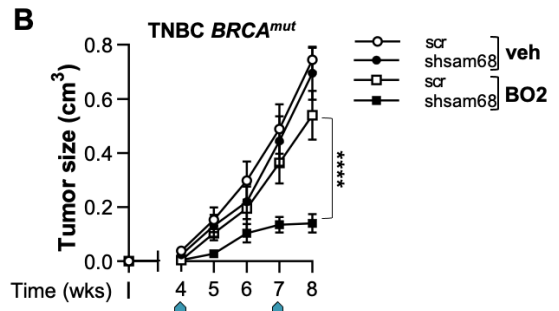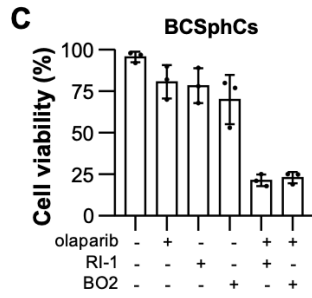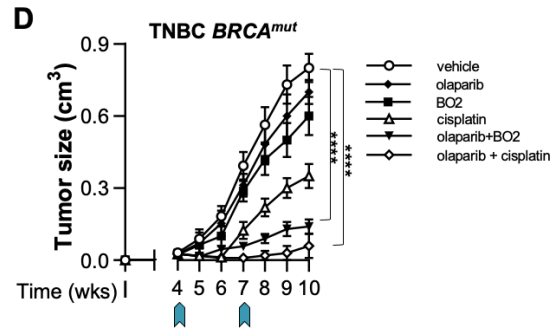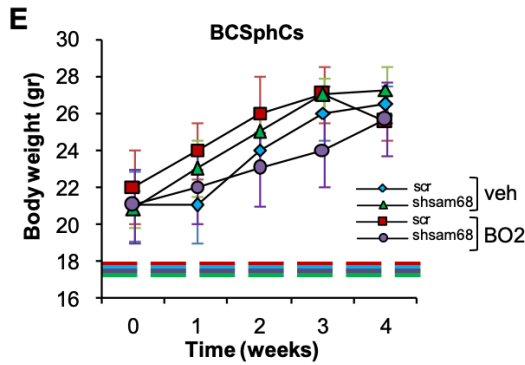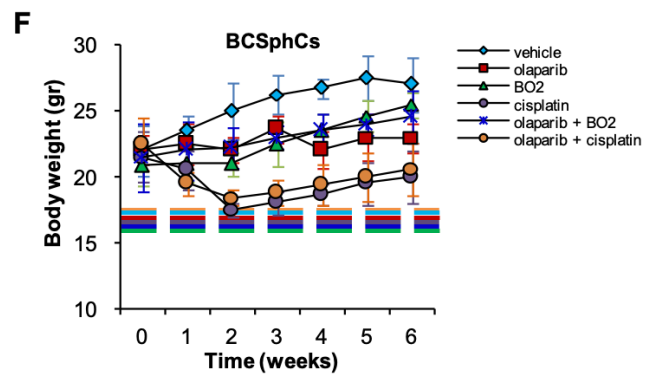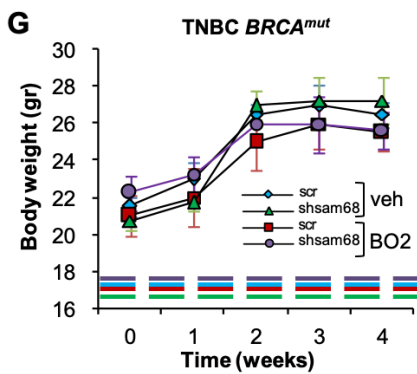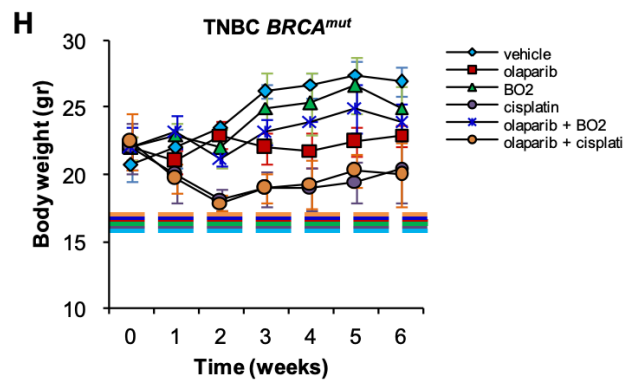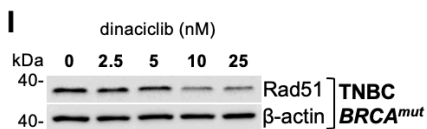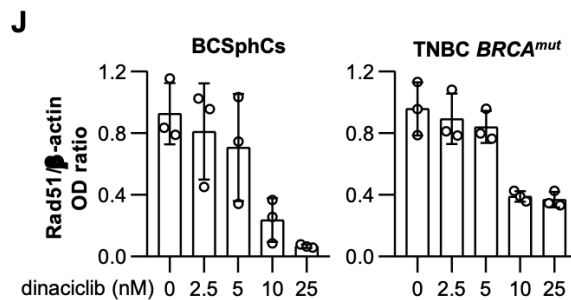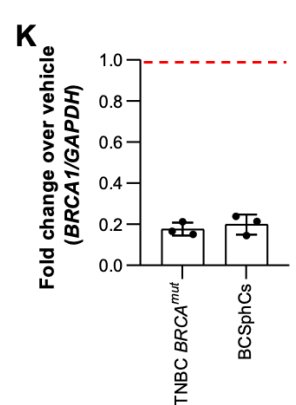

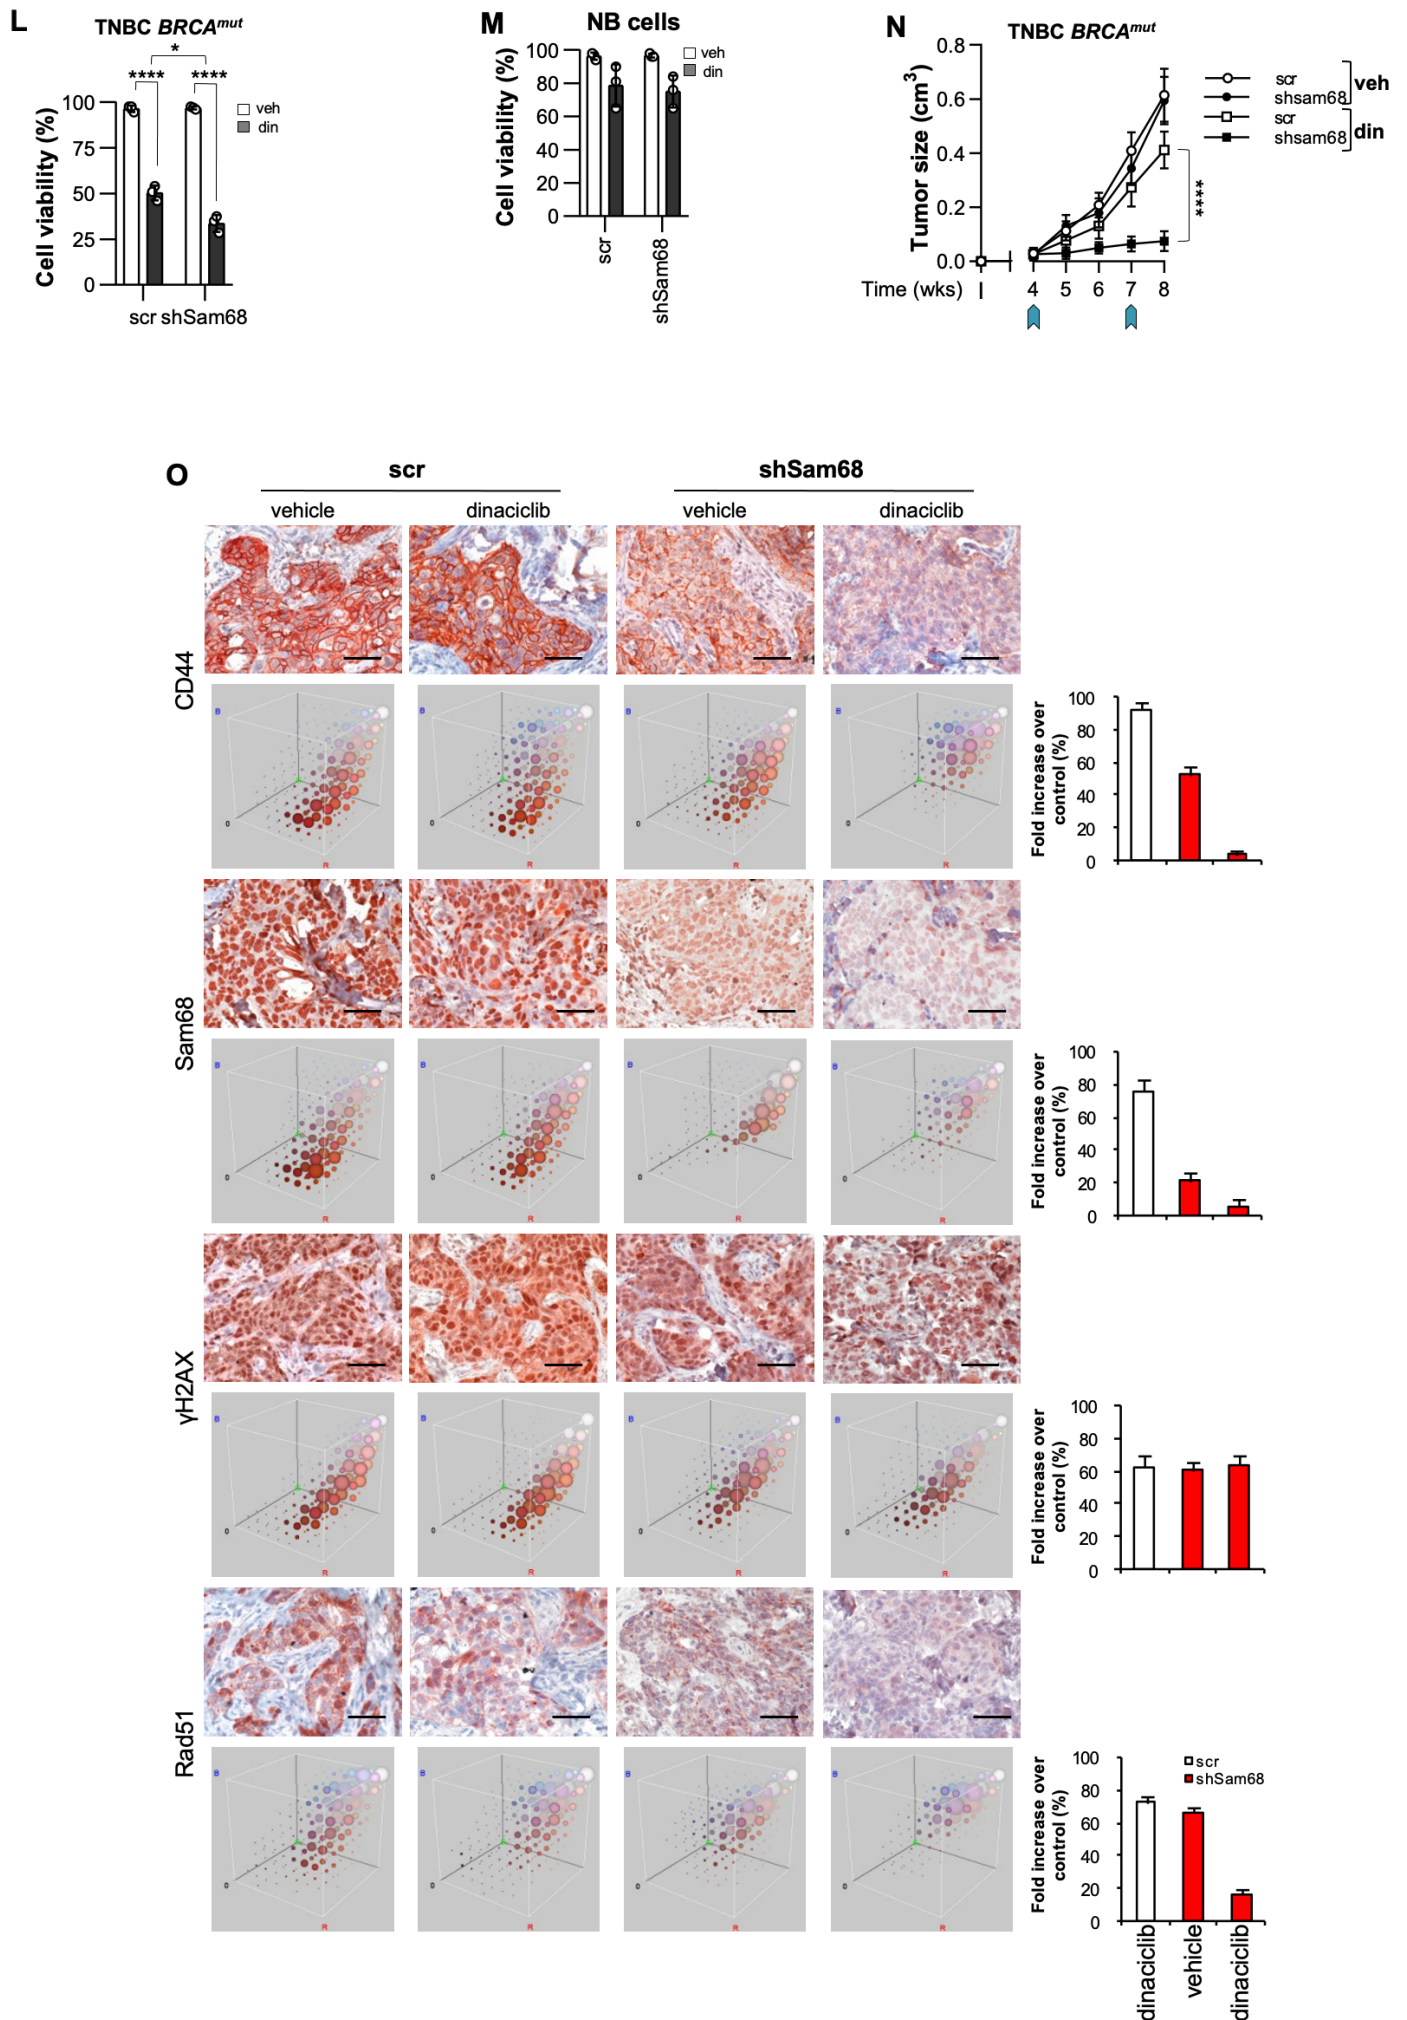

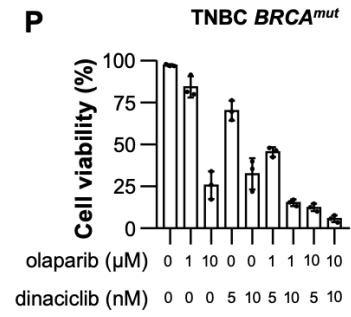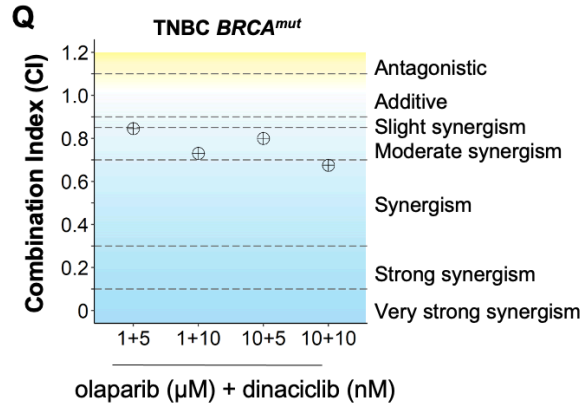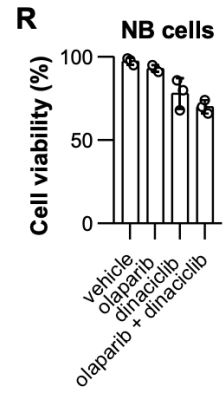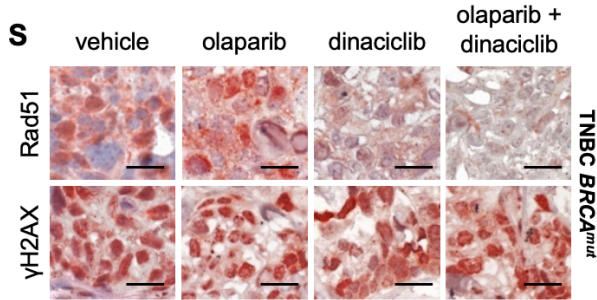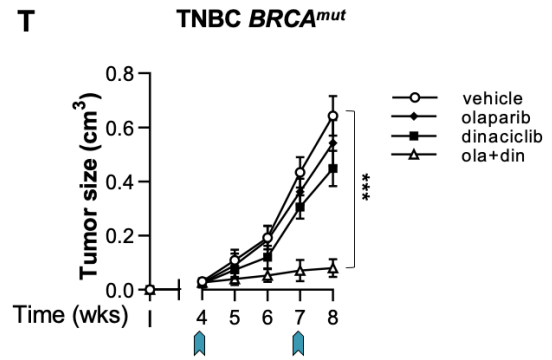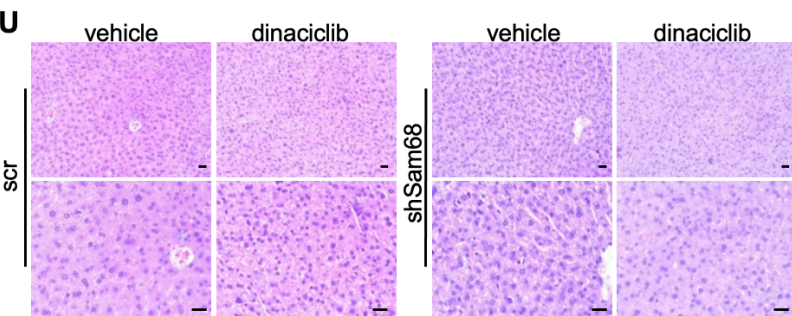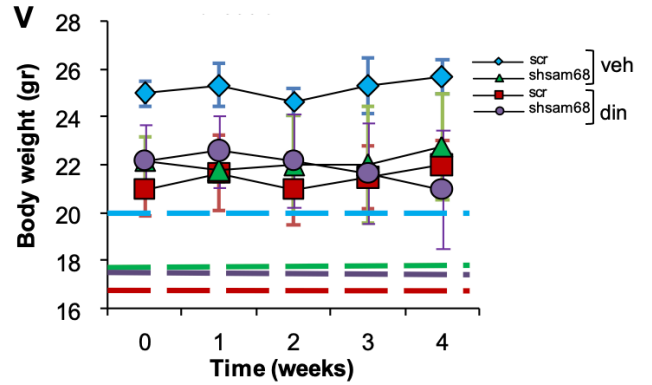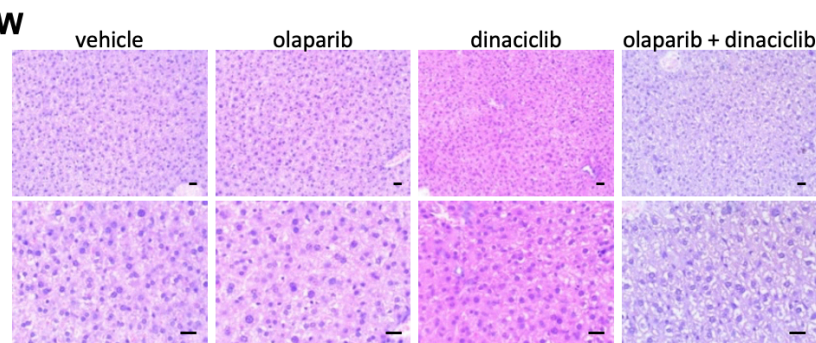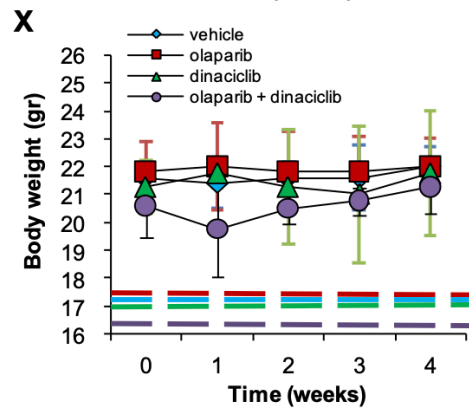

Supplement: 41388_2022_2239_MOESM5_ESM.pdf [file 41388_2022_2239_MOESM5_ESM.pdf]
